# Supplementary material for: In Utero Exposure to Glucocorticoids and Pubertal Timing in Sons and Daughters
Source: PubMed Central journal article supplement (PMC6937234; doi:10.1038/s41598-019-56917-7), 2019-12-30
Supplement: 41598_2019_56917_MOESM1_ESM.pdf [file 41598_2019_56917_MOESM1_ESM.pdf]

## Supplementary material

In Utero Exposure to Glucocorticoids and Pubertal Timing in Sons and Daughters

Scientific Reports

Sofie Aagaard Sand, MB<sup>1</sup>, Andreas Ernst, MD, PhD<sup>1,2</sup>, Lea Lykke Harrits Lunddorf, MD<sup>1</sup>, Nis Brix, MD<sup>1</sup>, Anne Gaml-Sørensen, MHSc<sup>1</sup>, Cecilia Høst Ramlau-Hansen, MHSc, PhD<sup>1</sup>

<sup>1</sup>Department of Public Health, Research Unit for Epidemiology, Aarhus University, Aarhus, Denmark

<sup>2</sup>Department of Urology, Aarhus University Hospital, Aarhus, Denmark

### **Corresponding author**

Sofie Aagaard Sand

sofie.sand@outlook.com

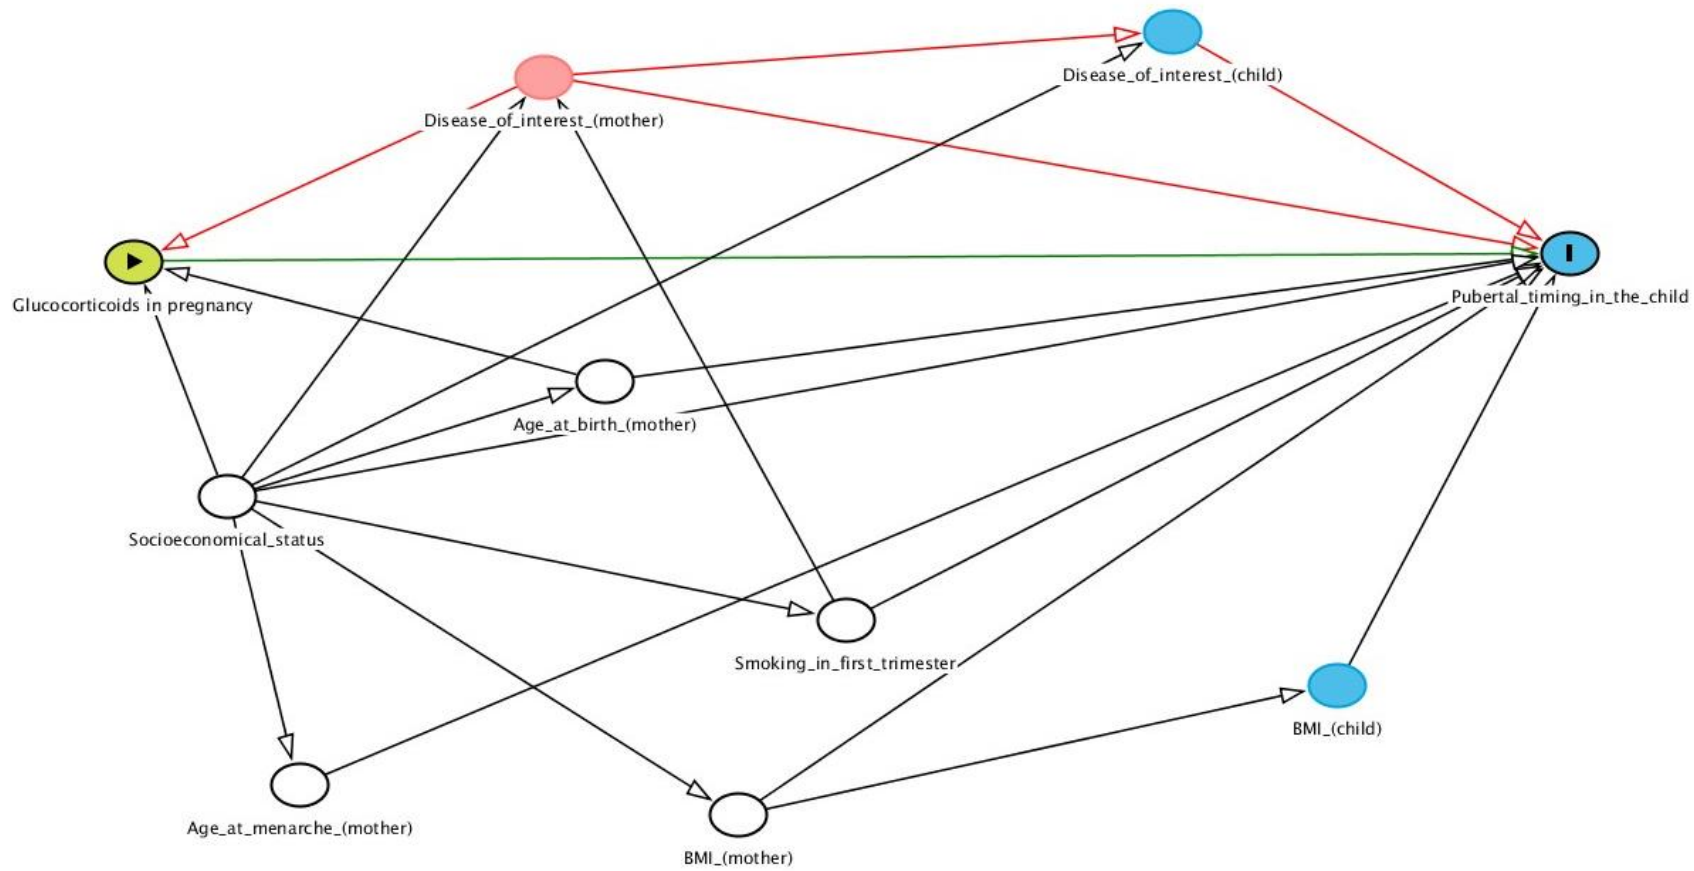

**Supplementary Fig. 1** Directed acyclic graph used to identify potential confounders

**Supplementary Table 1** Mean monthly age differences in pubertal timing according to in utero glucocorticoid exposure in the Puberty Cohort

| Pubertal Milestones |                   | Exposure to Glucocorticoids |          |            |                  |                     |           |                  |                     |           |
|---------------------|-------------------|-----------------------------|----------|------------|------------------|---------------------|-----------|------------------|---------------------|-----------|
|                     |                   | Unexposed                   |          |            | ICS/INCS1        |                     |           | Other            |                     |           |
|                     |                   | No.                         | Mean Age | 95 % CI    | Crude Mean Diff. | Adjusted Mean Diff. | 95 % CI   | Crude Mean Diff. | Adjusted Mean Diff. | 95 % CI   |
| Boys                | Tanner Genitals   |                             |          |            |                  |                     |           |                  |                     |           |
|                     | Stage 2           | 7458                        | 10.6     | 10.2, 10.9 | 1.2              | 1.1                 | -1.7, 3.9 | -0.5             | -0.6                | -3.3, 2.2 |
|                     | Stage 3           | 7458                        | 12.0     | 11.7, 12.4 | 2.2              | 2.1                 | -0.4, 4.5 | -0.7             | -0.7                | -3.4, 1.9 |
|                     | Stage 4           | 7458                        | 13.2     | 12.8, 13.6 | 1.1              | 1.2                 | -1.3, 3.6 | -0.4             | -0.4                | -2.9, 2.1 |
|                     | Stage 5           | 7458                        | 15.3     | 14.7, 15.9 | -1.3             | -1.2                | -4.7, 2.3 | -0.3             | -0.3                | -4.3, 3.7 |
|                     | Tanner Pubic Hair |                             |          |            |                  |                     |           |                  |                     |           |
|                     | Stage 2           | 7462                        | 11.0     | 10.7, 11.3 | -0.3             | -0.4                | -3.2, 2.4 | 0.9              | 1.0                 | -1.7, 3.6 |
|                     | Stage 3           | 7462                        | 12.3     | 12.0, 12.7 | 1.3              | 1.3                 | -0.8, 3.5 | 0.7              | 0.7                 | -1.6, 2.9 |
|                     | Stage 4           | 7462                        | 13.2     | 12.9, 13.6 | 0.7              | 0.8                 | -1.3, 2.9 | 0.5              | 0.5                 | -1.6, 2.5 |
|                     | Stage 5           | 7462                        | 14.5     | 14.0, 14.9 | 0.9              | 1.0                 | -1.6, 3.6 | -0.9             | -1.0                | -3.6, 1.6 |
|                     | Axillary hair     | 7467                        | 13.4     | 13.0, 13.9 | -0.1             | 0.0                 | -3.1, 3.1 | -0.4             | -0.6                | -3.4, 2.2 |
|                     | Acne              | 7467                        | 11.7     | 11.3, 12.0 | -0.5             | -0.5                | -3.1, 2.1 | -0.3             | -0.5                | -2.9, 1.9 |
|                     | Voice break       | 7264                        | 12.6     | 12.3, 13.0 | 0.1              | -0.1                | -2.7, 2.5 | 1.4              | 1.3                 | -1.2, 3.9 |
|                     | First ejaculation | 7454                        | 13.0     | 12.6, 13.4 | -1.2             | -1.1                | -4.0, 1.8 | -0.2             | 0.0                 | -2.2, 2.1 |
|                     | Combined estimate | 7264                        |          |            |                  | 0.4                 | -1.5, 2.2 |                  | -0.1                | -1.8, 1.7 |
| Girls               | Tanner Breast     |                             |          |            |                  |                     |           |                  |                     |           |
|                     | Stage 2           | 7869                        | 9.5      | 8.9, 10.1  | 1.1              | 1.4                 | -2.1, 4.8 | -0.8             | -0.4                | -3.7, 3.0 |
|                     | Stage 3           | 7869                        | 11.1     | 10.7, 11.4 | -0.2             | 0.3                 | -2.0, 2.6 | -0.2             | 0.4                 | -1.7, 2.4 |
|                     | Stage 4           | 7869                        | 12.8     | 12.4, 13.1 | -1.4             | -1.0                | -3.2, 1.2 | -0.3             | 0.1                 | -2.1, 2.3 |
|                     | Stage 5           | 7869                        | 16.1     | 15.5, 16.8 | -0.5             | -0.2                | -5.1, 4.8 | 2.0              | 2.3                 | -1.8, 6.3 |
|                     | Tanner Pubic Hair |                             |          |            |                  |                     |           |                  |                     |           |
|                     | Stage 2           | 7870                        | 10.9     | 10.6, 11.2 | -0.9             | -0.6                | -2.5, 1.3 | 0.9              | 1.3                 | -0.5, 3.0 |
|                     | Stage 3           | 7870                        | 12.1     | 11.8, 12.4 | -1.6             | -1.2                | -3.0, 0.7 | -0.4             | 0.0                 | -1.6, 1.6 |
|                     | Stage 4           | 7870                        | 13.3     | 12.9, 13.7 | -2.2             | -1.9                | -4.3, 0.5 | -1.8             | -1.3                | -3.4, 0.7 |
|                     | Stage 5           | 7870                        | 16.1     | 15.5, 16.6 | -0.8             | -0.7                | -4.9, 3.4 | 0.2              | 0.7                 | -2.6, 3.9 |
|                     | Axillary hair     | 7875                        | 11.6     | 11.2, 12.0 | -1.3             | -0.8                | -3.6, 2.1 | -0.5             | 0.1                 | -2.2, 2.4 |
|                     | Acne              | 7875                        | 11.2     | 10.7, 11.7 | -0.6             | -0.4                | -3.4, 2.7 | 1.7              | 2.2                 | -0.6, 4.9 |
|                     | Menarche          | 7867                        | 12.7     | 12.4, 13.0 | -0.4             | -0.2                | -2.0, 1.7 | 0.0              | 0.3                 | -1.5, 2.2 |
|                     | Combined estimate | 7867                        |          |            |                  | -0.7                | -2.5, 1.2 |                  | 0.4                 | -1.2, 1.9 |

ICS: inhaled corticosteroids. INCS1: first-generation intranasal corticosteroids. Others include second-generation intranasal corticosteroids, cream, tablets, injections, suppositories, eye- and eardrops.

**Supplementary Table 2** Mean monthly age differences in pubertal timing according to in utero glucocorticoid exposure and duration of exposure in the Puberty Cohort

|                     |                   | Exposure to Glucocorticoids (ICS/INCS1) |            |            |                  |                     |           |
|---------------------|-------------------|-----------------------------------------|------------|------------|------------------|---------------------|-----------|
|                     |                   | Unexposed                               |            |            | Exposed          |                     |           |
| Pubertal Milestones |                   | No.                                     | Mean Age   | 95 % CI    | Crude Mean Diff. | Adjusted Mean Diff. | 95 % CI   |
| Boys                | Tanner Genitals   |                                         |            |            |                  |                     |           |
|                     | Stage 2           | 7186                                    | 10.6       | 10.3, 11.0 | 0.3              | 0.3                 | -0.4, 1.1 |
|                     | Stage 3           | 7186                                    | 12.1       | 11.7, 12.4 | 0.5              | 0.5                 | -0.1, 1.0 |
|                     | Stage 4           | 7186                                    | 13.2       | 12.8, 13.6 | 0.3              | 0.4                 | -0.2, 0.9 |
|                     | Stage 5           | 7186                                    | 15.3       | 14.7, 15.9 | 0.3              | 0.3                 | -0.5, 1.2 |
|                     | Tanner Pubic Hair |                                         |            |            |                  |                     |           |
|                     | Stage 2           | 7189                                    | 11.0       | 10.7, 11.3 | 0.0              | 0.0                 | -0.7, 0.7 |
|                     | Stage 3           | 7189                                    | 12.3       | 12.0, 12.7 | 0.2              | 0.3                 | -0.3, 0.8 |
|                     | Stage 4           | 7189                                    | 13.2       | 12.9, 13.5 | 0.3              | 0.3                 | -0.2, 0.9 |
|                     | Stage 5           | 7189                                    | 14.4       | 14.0, 14.9 | 0.4              | 0.5                 | -0.2, 1.2 |
|                     | Axillary hair     | 7193                                    | 13.4       | 12.9, 13.8 | 0.0              | 0.1                 | -0.7, 0.9 |
|                     | Acne              | 7193                                    | 11.6       | 11.3, 12.0 | -0.2             | -0.2                | -0.8, 0.5 |
|                     | Voice break       | 7002                                    | 12.6       | 12.2, 13.0 | 0.1              | 0.2                 | -0.4, 0.7 |
| First ejaculation   | 7182              | 13.0                                    | 12.6, 13.4 | 0.0        | 0.0              | -0.7, 0.7           |           |
| Girls               | Tanner Breast     |                                         |            |            |                  |                     |           |
|                     | Stage 2           | 7569                                    | 9.5        | 8.9, 10.1  | 0.4              | 0.6                 | -0.3, 1.4 |
|                     | Stage 3           | 7569                                    | 11.1       | 10.7, 11.5 | 0.1              | 0.3                 | -0.3, 0.8 |
|                     | Stage 4           | 7569                                    | 12.7       | 12.3, 13.1 | -0.1             | 0.0                 | -0.6, 0.6 |
|                     | Stage 5           | 7569                                    | 16.0       | 15.3, 16.7 | 0.1              | 0.2                 | -1.0, 1.4 |
|                     | Tanner Pubic Hair |                                         |            |            |                  |                     |           |
|                     | Stage 2           | 7570                                    | 11.0       | 10.6, 11.3 | -0.1             | 0.0                 | -0.5, 0.5 |
|                     | Stage 3           | 7570                                    | 12.2       | 11.8, 12.5 | -0.3             | -0.2                | -0.7, 0.2 |
|                     | Stage 4           | 7570                                    | 13.3       | 12.9, 13.7 | -0.3             | -0.2                | -0.9, 0.4 |
|                     | Stage 5           | 7570                                    | 16.1       | 15.5, 16.6 | 0.2              | 0.3                 | -0.8, 1.4 |
|                     | Axillary hair     | 7575                                    | 11.7       | 11.2, 12.1 | -0.4             | -0.3                | -0.9, 0.4 |
| Acne                | 7575              | 11.2                                    | 10.8, 11.7 | 0.0        | 0.1              | -0.6, 0.9           |           |
| Menarche            | 7567              | 12.7                                    | 12.4, 13.0 | 0.0        | 0.1              | -0.4, 0.5           |           |

ICS: inhaled corticosteroids. INCS1: first-generation intranasal corticosteroids.

**Supplementary Table 3** Mean monthly age differences in pubertal timing according to in utero glucocorticoid exposure when excluding children born before week 34+0 in the Puberty Cohort

|                     |                   | Exposure to Glucocorticoids |          |            |                  |                     |           |                  |                     |           |
|---------------------|-------------------|-----------------------------|----------|------------|------------------|---------------------|-----------|------------------|---------------------|-----------|
|                     |                   | Unexposed                   |          |            | ICS/INCS1        |                     |           | Other            |                     |           |
| Pubertal Milestones |                   | No.                         | Mean Age | 95 % CI    | Crude Mean Diff. | Adjusted Mean Diff. | 95 % CI   | Crude Mean Diff. | Adjusted Mean Diff. | 95 % CI   |
| Boys                | Tanner Genitals   |                             |          |            |                  |                     |           |                  |                     |           |
|                     | Stage 2           | 7331                        | 10.6     | 10.2, 10.9 | 1.2              | 1.1                 | -1.7, 3.9 | -0.6             | -0.6                | -3.4, 2.2 |
|                     | Stage 3           | 7331                        | 12.0     | 11.7, 12.4 | 2.2              | 2.0                 | -0.4, 4.5 | -0.7             | -0.7                | -3.4, 2.0 |
|                     | Stage 4           | 7331                        | 13.2     | 12.8, 13.6 | 1.1              | 1.1                 | -1.3, 3.6 | -0.3             | -0.4                | -2.9, 2.2 |
|                     | Stage 5           | 7331                        | 15.3     | 14.7, 15.9 | -1.3             | -1.2                | -4.6, 2.3 | -0.3             | -0.3                | -4.3, 3.7 |
|                     | Tanner Pubic Hair |                             |          |            |                  |                     |           |                  |                     |           |
|                     | Stage 2           | 7335                        | 11.0     | 10.7, 11.3 | -0.4             | -0.5                | -3.3, 2.3 | 0.9              | 0.9                 | -1.8, 3.6 |
|                     | Stage 3           | 7335                        | 12.3     | 12.0, 12.7 | 1.3              | 1.3                 | -0.9, 3.5 | 0.7              | 0.6                 | -1.7, 2.9 |
|                     | Stage 4           | 7335                        | 13.2     | 12.9, 13.5 | 0.6              | 0.8                 | -1.4, 2.9 | 0.5              | 0.5                 | -1.6, 2.5 |
|                     | Stage 5           | 7335                        | 14.5     | 14.0, 14.9 | 0.9              | 1.0                 | -1.6, 3.5 | -1.0             | -1.0                | -3.6, 1.6 |
|                     | Axillary hair     | 7340                        | 13.4     | 13.0, 13.9 | -0.1             | -0.1                | -3.2, 3.1 | -0.3             | -0.5                | -3.3, 2.3 |
|                     | Acne              | 7340                        | 11.7     | 11.3, 12.0 | -0.6             | -0.6                | -3.2, 2.0 | -0.3             | -0.4                | -2.8, 1.9 |
|                     | Voice break       | 7138                        | 12.6     | 12.3, 13.0 | 0.1              | -0.1                | -2.7, 2.5 | 1.7              | 1.6                 | -1.0, 4.1 |
|                     | First ejaculation | 7327                        | 12.9     | 12.5, 13.3 | -1.1             | -1.0                | -3.9, 1.9 | -0.2             | 0.0                 | -2.2, 2.1 |
|                     | Combined estimate | 7138                        |          |            |                  | 0.4                 | -1.5, 2.2 |                  | 0.0                 | -1.8, 1.8 |
| Girls               | Tanner Breast     |                             |          |            |                  |                     |           |                  |                     |           |
|                     | Stage 2           | 7764                        | 9.5      | 8.9, 10.1  | 0.9              | 1.2                 | -2.3, 4.8 | -0.8             | -0.3                | -3.7, 3.0 |
|                     | Stage 3           | 7764                        | 11.1     | 10.7, 11.4 | -0.2             | 0.2                 | -2.1, 2.5 | -0.2             | 0.3                 | -1.7, 2.4 |
|                     | Stage 4           | 7764                        | 12.8     | 12.4, 13.1 | -1.4             | -1.0                | -3.2, 1.2 | -0.3             | 0.1                 | -2.1, 2.3 |
|                     | Stage 5           | 7764                        | 16.2     | 15.5, 16.8 | -0.6             | -0.2                | -5.2, 4.8 | 2.1              | 2.3                 | -1.7, 6.4 |
|                     | Tanner Pubic Hair |                             |          |            |                  |                     |           |                  |                     |           |
|                     | Stage 2           | 7765                        | 10.9     | 10.6, 11.2 | -1.0             | -0.7                | -2.6, 1.2 | 0.9              | 1.3                 | -0.5, 3.0 |
|                     | Stage 3           | 7765                        | 12.1     | 11.8, 12.4 | -1.7             | -1.2                | -3.1, 0.6 | -0.4             | 0.0                 | -1.6, 1.6 |
|                     | Stage 4           | 7765                        | 13.3     | 12.9, 13.6 | -2.3             | -1.9                | -4.3, 0.5 | -1.8             | -1.4                | -3.4, 0.7 |
|                     | Stage 5           | 7765                        | 16.1     | 15.5, 16.6 | -0.9             | -0.8                | -4.9, 3.3 | 0.1              | 0.6                 | -2.7, 3.9 |
|                     | Axillary hair     | 7770                        | 11.6     | 11.2, 12.0 | -1.4             | -0.9                | -3.7, 2.0 | -0.5             | 0.0                 | -2.3, 2.3 |
|                     | Acne              | 7770                        | 11.2     | 10.7, 11.7 | -0.7             | -0.5                | -3.6, 2.6 | 1.7              | 2.2                 | -0.6, 4.9 |
|                     | Menarche          | 7762                        | 12.7     | 12.4, 13.0 | -0.4             | -0.2                | -2.1, 1.6 | -0.1             | 0.3                 | -1.6, 2.2 |
|                     | Combined estimate | 7762                        |          |            |                  | -0.7                | -2.6, 1.1 |                  | 0.4                 | -1.2, 1.9 |

ICS: inhaled corticosteroids. INCS1: first-generation intranasal corticosteroids. Others include second-generation intranasal corticosteroids, cream, tablets, injections, suppositories, eye- and eardrops.

**Supplementary Table 4** Mean monthly age differences in pubertal timing according to in utero glucocorticoid exposure additionally adjusted for childhood asthma in the Puberty Cohort

| Pubertal Milestones |      | Exposure to Glucocorticoids |            |         |                  |                     |         |                  |                     |         |
|---------------------|------|-----------------------------|------------|---------|------------------|---------------------|---------|------------------|---------------------|---------|
|                     |      | Unexposed                   |            |         | ICS/INCS1        |                     |         | Other            |                     |         |
|                     |      | No.                         | Mean Age   | 95 % CI | Crude Mean Diff. | Adjusted Mean Diff. | 95 % CI | Crude Mean Diff. | Adjusted Mean Diff. | 95 % CI |
| <b>Boys</b>         |      |                             |            |         |                  |                     |         |                  |                     |         |
| Tanner Genitals     |      |                             |            |         |                  |                     |         |                  |                     |         |
| Stage 2             | 5466 | 10.4                        | 9.9, 10.9  | 1.2     | 1.6              | -1.5, 4.7           | -0.5    | 0.9              | -2.1, 3.9           |         |
| Stage 3             | 5466 | 11.7                        | 11.2, 12.2 | 2.2     | 2.0              | -0.9, 4.8           | -0.7    | 0.5              | -2.6, 3.5           |         |
| Stage 4             | 5466 | 13.1                        | 12.6, 13.5 | 1.1     | 1.0              | -1.8, 3.8           | -0.4    | 0.0              | -2.9, 2.8           |         |
| Stage 5             | 5466 | 14.9                        | 14.1, 15.7 | -1.3    | -0.5             | -4.4, 3.4           | -0.3    | 0.8              | -3.8, 5.5           |         |
| Tanner Pubic Hair   |      |                             |            |         |                  |                     |         |                  |                     |         |
| Stage 2             | 5467 | 10.8                        | 10.4, 11.2 | -0.3    | -0.1             | -3.2, 3.0           | 0.9     | 2.5              | -0.5, 5.6           |         |
| Stage 3             | 5467 | 12.2                        | 11.7, 12.6 | 1.3     | 1.8              | -0.7, 4.2           | 0.7     | 2.1              | -0.5, 4.6           |         |
| Stage 4             | 5467 | 13.1                        | 12.7, 13.5 | 0.7     | 0.6              | -1.7, 3.0           | 0.5     | 0.9              | -1.5, 3.3           |         |
| Stage 5             | 5467 | 14.3                        | 13.7, 14.9 | 0.9     | 2.1              | -0.8, 5.0           | -0.9    | -0.1             | -3.1, 2.8           |         |
| Axillary hair       | 5470 | 13.6                        | 13.0, 14.1 | -0.1    | -0.3             | -3.8, 3.3           | -0.4    | -0.5             | -3.7, 2.8           |         |
| Acne                | 5470 | 11.7                        | 11.2, 12.1 | -0.5    | -0.8             | -3.8, 2.1           | -0.3    | -0.5             | -3.2, 2.3           |         |
| Voice break         | 5358 | 12.4                        | 12.0, 12.9 | 0.1     | -0.8             | -3.6, 2.1           | 1.4     | 1.9              | -1.1, 4.8           |         |
| First ejaculation   | 5463 | 12.9                        | 12.4, 13.4 | -1.2    | -1.2             | -4.5, 2.0           | -0.2    | 0.3              | -2.3, 2.8           |         |
| Combined estimate   | 5358 |                             |            |         | 0.5              | -1.6, 2.6           |         | 0.7              | -1.4, 2.7           |         |
| <b>Girls</b>        |      |                             |            |         |                  |                     |         |                  |                     |         |
| Tanner Breast       |      |                             |            |         |                  |                     |         |                  |                     |         |
| Stage 2             | 5588 | 9.7                         | 9.0, 10.4  | 1.1     | -0.4             | -4.3, 3.6           | -0.8    | -0.3             | -4.1, 3.5           |         |
| Stage 3             | 5588 | 11.2                        | 10.8, 11.6 | -0.2    | -0.7             | -3.4, 2.1           | -0.2    | -0.3             | -2.8, 2.2           |         |
| Stage 4             | 5588 | 12.8                        | 12.4, 13.2 | -1.4    | -1.9             | -4.3, 0.6           | -0.3    | 0.0              | -2.5, 2.6           |         |
| Stage 5             | 5588 | 15.9                        | 15.2, 16.7 | -0.5    | -2.1             | -7.8, 3.5           | 2.0     | 1.8              | -3.0, 6.6           |         |
| Tanner Pubic Hair   |      |                             |            |         |                  |                     |         |                  |                     |         |
| Stage 2             | 5588 | 11.0                        | 10.7, 11.3 | -0.9    | -1.1             | -3.1, 1.0           | 0.9     | -0.7             | -2.7, 1.3           |         |
| Stage 3             | 5588 | 12.2                        | 11.9, 12.6 | -1.6    | -2.0             | -4.0, 0.0           | -0.4    | -0.5             | -2.3, 1.3           |         |
| Stage 4             | 5588 | 13.4                        | 13.0, 13.8 | -2.2    | -3.2             | -6.0, -0.4          | -1.8    | -1.6             | -4.1, 0.8           |         |
| Stage 5             | 5588 | 16.2                        | 15.6, 16.8 | -0.8    | -2.3             | -6.7, 2.1           | 0.2     | 0.8              | -3.0, 4.6           |         |
| Axillary hair       | 5591 | 11.8                        | 11.3, 12.3 | -1.3    | -1.8             | -5.2, 1.7           | -0.5    | 0.0              | -2.8, 2.8           |         |
| Acne                | 5591 | 11.2                        | 10.7, 11.7 | -0.6    | -1.6             | -5.2, 1.9           | 1.7     | 1.8              | -1.5, 5.1           |         |
| Menarche            | 5586 | 12.7                        | 12.3, 13.0 | -0.4    | -0.9             | -2.9, 1.2           | 0.0     | -0.6             | -2.8, 1.6           |         |
| Combined estimate   | 5586 |                             |            |         | -1.7             | -3.8, 0.4           |         | -0.2             | -2.0, 1.7           |         |

ICS: inhaled corticosteroids. INCS1: first-generation intranasal corticosteroids. Others include second-generation intranasal corticosteroids, cream, tablets, injections, suppositories, eye- and eardrops.

**Supplementary Table 5** Mean monthly age differences in pubertal timing according to in utero glucocorticoid exposure additionally adjusted for childhood BMI in the Puberty Cohort

| Pubertal Milestones |                   | Exposure to Glucocorticoids |          |            |                  |                     |            |                  |                     |           |
|---------------------|-------------------|-----------------------------|----------|------------|------------------|---------------------|------------|------------------|---------------------|-----------|
|                     |                   | Unexposed                   |          |            | ICS/INCS1        |                     |            | Other            |                     |           |
|                     |                   | No.                         | Mean Age | 95 % CI    | Crude Mean Diff. | Adjusted Mean Diff. | 95 % CI    | Crude Mean Diff. | Adjusted Mean Diff. | 95 % CI   |
| Boys                | Tanner Genitals   |                             |          |            |                  |                     |            |                  |                     |           |
|                     | Stage 2           | 5333                        | 11.1     | 10.4, 11.8 | 1.2              | 1.9                 | -1.3, 5.1  | -0.5             | 0.8                 | -2.2, 3.9 |
|                     | Stage 3           | 5333                        | 12.9     | 12.3, 13.6 | 2.2              | 2.2                 | -0.6, 5.1  | -0.7             | -0.1                | -3.1, 2.9 |
|                     | Stage 4           | 5333                        | 13.6     | 12.8, 14.3 | 1.1              | 0.9                 | -1.9, 3.7  | -0.4             | -0.4                | -3.2, 2.4 |
|                     | Stage 5           | 5333                        | 15.5     | 14.6, 16.4 | -1.3             | -0.7                | -4.5, 3.2  | -0.3             | 0.5                 | -4.2, 5.1 |
|                     | Tanner Pubic Hair |                             |          |            |                  |                     |            |                  |                     |           |
|                     | Stage 2           | 5334                        | 11.1     | 10.5, 11.7 | -0.3             | 0.1                 | -3.0, 3.3  | 0.9              | 1.8                 | -1.1, 4.7 |
|                     | Stage 3           | 5334                        | 12.8     | 11.9, 13.6 | 1.3              | 2.0                 | -0.5, 4.5  | 0.7              | 1.7                 | -0.8, 4.2 |
|                     | Stage 4           | 5334                        | 13.6     | 12.9, 14.3 | 0.7              | 0.8                 | -1.6, 3.2  | 0.5              | 0.5                 | -1.9, 2.8 |
|                     | Stage 5           | 5334                        | 15.0     | 14.1, 15.9 | 0.9              | 2.0                 | -0.9, 4.8  | -0.9             | -0.3                | -3.3, 2.6 |
|                     | Axillary hair     | 5336                        | 14.6     | 13.3, 15.8 | -0.1             | -0.2                | -3.8, 3.3  | -0.4             | -1.0                | -4.2, 2.1 |
|                     | Acne              | 5336                        | 12.1     | 11.4, 12.9 | -0.5             | -0.4                | -3.3, 2.6  | -0.3             | -0.9                | -3.6, 1.8 |
|                     | Voice break       | 5232                        | 13.1     | 12.3, 13.9 | 0.1              | -0.5                | -3.3, 2.4  | 1.4              | 1.2                 | -1.8, 4.2 |
|                     | First ejaculation | 5330                        | 13.3     | 12.7, 13.9 | -1.2             | -1.2                | -4.5, 2.0  | -0.2             | -0.2                | -2.8, 2.3 |
|                     | Combined estimate | 5232                        |          |            |                  | 0.6                 | -1.5, 2.7  |                  | 0.2                 | -1.8, 2.2 |
| Girls               | Tanner Breast     |                             |          |            |                  |                     |            |                  |                     |           |
|                     | Stage 2           | 5411                        | 13.0     | 12.0, 14.0 | 1.1              | -0.4                | -4.2, 3.4  | -0.8             | -0.5                | -4.4, 3.5 |
|                     | Stage 3           | 5411                        | 12.1     | 11.1, 13.1 | -0.2             | -0.5                | -3.2, 2.2  | -0.2             | -0.6                | -3.1, 2.0 |
|                     | Stage 4           | 5411                        | 13.6     | 12.8, 14.5 | -1.4             | -1.5                | -4.0, 0.9  | -0.3             | -0.3                | -2.9, 2.3 |
|                     | Stage 5           | 5411                        | 17.1     | 15.9, 18.4 | -0.5             | -2.2                | -7.8, 3.5  | 2.0              | 1.2                 | -3.5, 5.9 |
|                     | Tanner Pubic Hair |                             |          |            |                  |                     |            |                  |                     |           |
|                     | Stage 2           | 5411                        | 11.8     | 11.3, 12.4 | -0.9             | -1.2                | -3.3, 0.9  | 0.9              | -0.8                | -2.8, 1.2 |
|                     | Stage 3           | 5411                        | 12.8     | 12.2, 13.4 | -1.6             | -2.1                | -4.1, -0.1 | -0.4             | -0.7                | -2.5, 1.0 |
|                     | Stage 4           | 5411                        | 14.1     | 13.4, 14.8 | -2.2             | -3.5                | -6.3, -0.7 | -1.8             | -1.9                | -4.3, 0.6 |
|                     | Stage 5           | 5411                        | 17.2     | 16.2, 18.2 | -0.8             | -2.8                | -7.1, 1.6  | 0.2              | 0.0                 | -3.7, 3.7 |
|                     | Axillary hair     | 5414                        | 12.6     | 11.7, 13.5 | -1.3             | -1.5                | -5.0, 1.9  | -0.5             | -0.4                | -3.2, 2.3 |
|                     | Acne              | 5414                        | 11.3     | 10.6, 12.1 | -0.6             | -1.7                | -5.2, 1.9  | 1.7              | 1.5                 | -1.9, 4.8 |
|                     | Menarche          | 5409                        | 13.5     | 12.7, 14.3 | -0.4             | -0.8                | -2.9, 1.3  | 0.0              | -0.6                | -2.8, 1.6 |
|                     | Combined estimate | 5409                        |          |            |                  | -1.7                | -3.8, 0.4  |                  | -0.4                | -2.3, 1.4 |

ICS: inhaled corticosteroids. INCS1: first-generation intranasal corticosteroids. Others include second-generation intranasal corticosteroids, cream, tablets, injections, suppositories, eye- and eardrops.

**Supplementary Table 6** Mean monthly age differences in pubertal timing according to in utero disease and medication status in the Puberty Cohort

|                     |                   | Exposure to Glucocorticoids (ICS/INCS1) |          |            |                                   |                     |            |                                |                     |            |                                      |                     |           |
|---------------------|-------------------|-----------------------------------------|----------|------------|-----------------------------------|---------------------|------------|--------------------------------|---------------------|------------|--------------------------------------|---------------------|-----------|
|                     |                   | Unexposed                               |          |            | Group 2 (diseased + no treatment) |                     |            | Group 3 (diseased + treatment) |                     |            | Group 4 (diseased + glucocorticoids) |                     |           |
| Pubertal Milestones |                   | No.                                     | Mean Age | 95 % CI    | Crude Mean Diff.                  | Adjusted Mean Diff. | 95 % CI    | Crude Mean Diff.               | Adjusted Mean Diff. | 95 % CI    | Crude Mean Diff.                     | Adjusted Mean Diff. | 95 % CI   |
| Boys                | Tanner Genitals   |                                         |          |            |                                   |                     |            |                                |                     |            |                                      |                     |           |
|                     | Stage 2           | 7091                                    | 10.6     | 10.3, 11.0 | -0.2                              | -0.2                | -1.5, 1.2  | -0.4                           | -0.3                | -2.4, 1.7  | 1.2                                  | 1.1                 | -1.7, 3.9 |
|                     | Stage 3           | 7091                                    | 12.1     | 11.7, 12.4 | -1.3                              | -1.1                | -2.3, 0.2  | 0.0                            | 0.2                 | -1.9, 2.2  | 2.3                                  | 2.2                 | -0.3, 4.6 |
|                     | Stage 4           | 7091                                    | 13.2     | 12.8, 13.6 | -1.3                              | -1.0                | -2.3, 0.2  | 0.0                            | 0.2                 | -1.9, 2.2  | 1.1                                  | 1.2                 | -1.3, 3.7 |
|                     | Stage 5           | 7091                                    | 15.3     | 14.7, 15.9 | -2.9                              | -2.6                | -4.5, -0.7 | 2.1                            | 2.3                 | -1.0, 5.5  | -1.2                                 | -1.0                | -4.4, 2.5 |
|                     | Tanner Pubic Hair |                                         |          |            |                                   |                     |            |                                |                     |            |                                      |                     |           |
|                     | Stage 2           | 7094                                    | 11.0     | 10.7, 11.3 | -0.8                              | -0.7                | -1.9, 0.6  | -0.4                           | -0.3                | -2.2, 1.7  | -0.4                                 | -0.4                | -3.2, 2.4 |
|                     | Stage 3           | 7094                                    | 12.3     | 12.0, 12.7 | -1.3                              | -1.0                | -2.1, 0.1  | -0.2                           | 0.0                 | -1.7, 1.8  | 1.3                                  | 1.4                 | -0.7, 3.6 |
|                     | Stage 4           | 7094                                    | 13.2     | 12.9, 13.6 | -1.7                              | -1.3                | -2.4, -0.3 | -0.1                           | 0.1                 | -1.5, 1.7  | 0.5                                  | 0.7                 | -1.4, 2.9 |
|                     | Stage 5           | 7094                                    | 14.4     | 14.0, 14.9 | -1.8                              | -1.4                | -2.8, 0.0  | 0.1                            | 0.4                 | -1.6, 2.4  | 1.0                                  | 1.1                 | -1.4, 3.7 |
|                     | Axillary hair     | 7098                                    | 13.4     | 13.0, 13.9 | -2.2                              | -1.7                | -3.1, -0.3 | -0.5                           | 0.0                 | -2.1, 2.1  | -0.3                                 | -0.1                | -3.2, 3.0 |
|                     | Acne              | 7098                                    | 11.6     | 11.3, 12.0 | -0.7                              | -0.3                | -1.5, 0.9  | 0.4                            | 0.7                 | -1.1, 2.5  | -0.6                                 | -0.5                | -3.1, 2.2 |
|                     | Voice break       | 6910                                    | 12.6     | 12.2, 13.0 | -0.8                              | -0.4                | -1.7, 0.9  | 0.2                            | 0.5                 | -1.6, 2.6  | 0.3                                  | 0.2                 | -2.3, 2.8 |
|                     | First ejaculation | 7087                                    | 13.0     | 12.6, 13.4 | -0.2                              | 0.0                 | -1.2, 1.2  | 1.5                            | 1.6                 | -0.4, 3.7  | -1.1                                 | -1.0                | -3.9, 2.0 |
|                     | Combined estimate | 6910                                    |          |            |                                   | -0.9                | -1.7, 0.0  |                                | 0.4                 | -0.9, 1.7  |                                      | 0.5                 | -1.4, 2.3 |
| Girls               | Tanner Breast     |                                         |          |            |                                   |                     |            |                                |                     |            |                                      |                     |           |
|                     | Stage 2           | 7483                                    | 9.5      | 8.9, 10.2  | -2.3                              | -1.7                | -3.5, 0.1  | -2.3                           | -1.5                | -4.4, 1.3  | 0.6                                  | 1.0                 | -2.5, 4.4 |
|                     | Stage 3           | 7483                                    | 11.2     | 10.8, 11.5 | -1.9                              | -1.4                | -2.5, -0.3 | -2.2                           | -1.7                | -3.5, 0.0  | -0.7                                 | -0.1                | -2.4, 2.2 |
|                     | Stage 4           | 7483                                    | 12.7     | 12.4, 13.1 | -2.2                              | -1.8                | -3.0, -0.7 | -1.2                           | -0.7                | -2.6, 1.1  | -1.8                                 | -1.3                | -3.5, 0.9 |
|                     | Stage 5           | 7483                                    | 16.0     | 15.3, 16.7 | -2.6                              | -2.0                | -4.0, 0.1  | -0.3                           | 0.2                 | -3.1, 3.4  | -0.9                                 | -0.4                | -5.4, 4.7 |
|                     | Tanner Pubic Hair |                                         |          |            |                                   |                     |            |                                |                     |            |                                      |                     |           |
|                     | Stage 2           | 7484                                    | 11.0     | 10.7, 11.3 | -0.5                              | -0.4                | -1.3, 0.6  | -1.8                           | -1.6                | -3.1, -0.2 | -1.3                                 | -0.9                | -2.8, 1.0 |
|                     | Stage 3           | 7484                                    | 12.2     | 11.9, 12.5 | -0.6                              | -0.4                | -1.3, 0.5  | -1.2                           | -0.9                | -2.4, 0.6  | -1.8                                 | -1.4                | -3.3, 0.5 |
|                     | Stage 4           | 7484                                    | 13.3     | 12.9, 13.7 | -1.2                              | -1.0                | -2.2, 0.2  | -0.5                           | -0.2                | -2.1, 1.8  | -2.5                                 | -2.1                | -4.5, 0.4 |
|                     | Stage 5           | 7484                                    | 16.1     | 15.6, 16.7 | -2.8                              | -2.5                | -4.3, -0.7 | -1.5                           | -1.2                | -4.1, 1.7  | -1.4                                 | -1.2                | -5.4, 2.9 |
|                     | Axillary hair     | 7489                                    | 11.7     | 11.3, 12.1 | -1.1                              | -0.9                | -2.2, 0.5  | -2.2                           | -1.8                | -3.8, 0.2  | -1.7                                 | -1.1                | -4.0, 1.8 |
|                     | Acne              | 7489                                    | 11.3     | 10.8, 11.8 | -0.5                              | -0.1                | -1.5, 1.3  | 0.1                            | 0.6                 | -1.7, 3.0  | -0.5                                 | -0.2                | -3.3, 2.9 |
|                     | Menarche          | 7481                                    | 12.7     | 12.4, 13.1 | -1.1                              | -0.6                | -1.5, 0.3  | -0.7                           | -0.2                | -1.8, 1.3  | -0.7                                 | -0.4                | -2.2, 1.5 |
|                     | Combined estimate | 7481                                    |          |            |                                   | -1.1                | -1.9, -0.2 |                                | -0.9                | -2.2, 0.4  |                                      | -0.9                | -2.8, 1.0 |

ICS: inhaled corticosteroids. INCS1: first-generation intranasal corticosteroids. Diseased refers to asthma, allergy, skin diseases or muscle and joint diseases. Treatment refers to treatment for the disease without glucocorticoids.
